# Supplementary material for: Effect of Poly(vinyl alcohol) on Nanoencapsulation of Budesonide in Chitosan Nanoparticles via Ionic Gelation and Its Improved Bioavailability
Source: Polymers (Basel). 2020 May 12;12(5):1101. doi: 10.3390/polym12051101 (PMC7285374; doi:10.3390/polym12051101)
Supplement: Supplementary file 1 [file polymers-12-01101-s001.pdf]

## Supporting Information

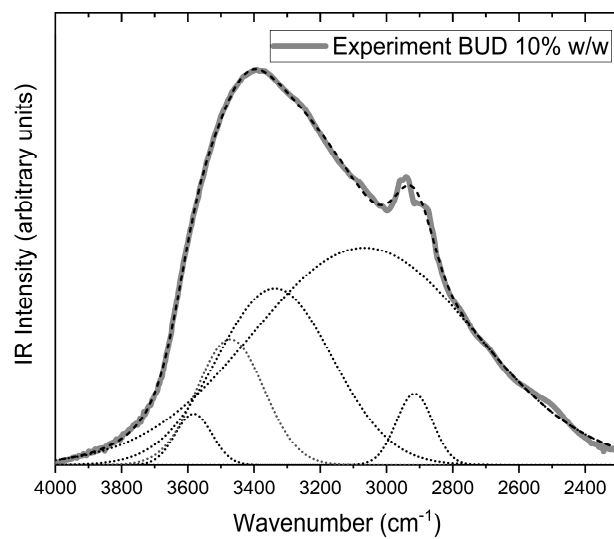

(a)

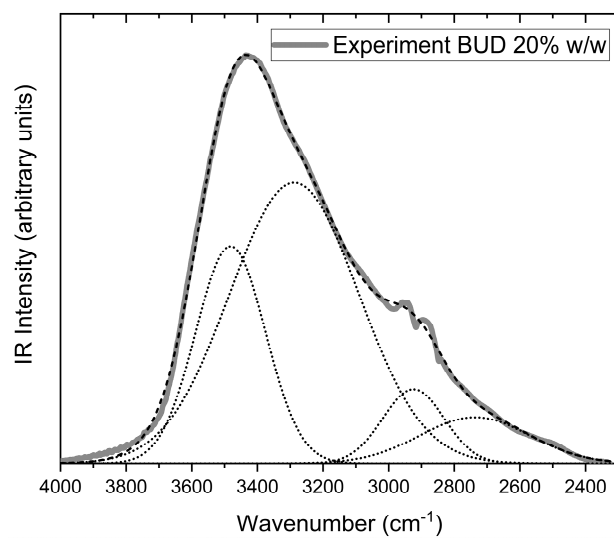

(b)

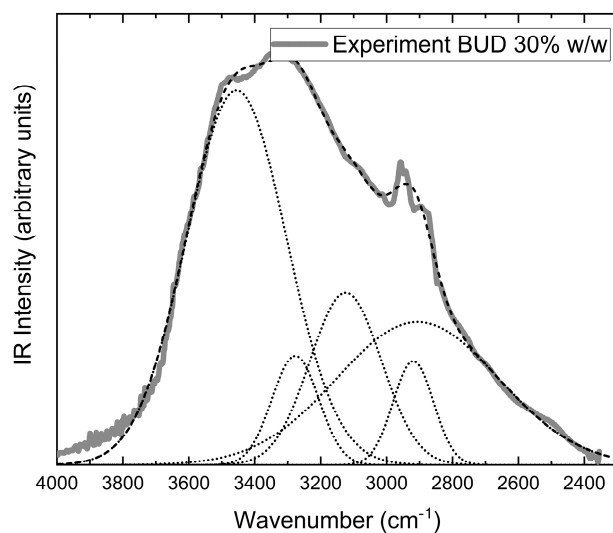

(c)

**Figure S1 1a-c.** Decomposition of FTIR spectra at large-wavenumbers for the cases of (a) 10%, (b) 20%, and (c) 30% w/w BUD concentration. The 20% w/w case shows the subpeak at  $2900\text{ cm}^{-1}$  with less than half the intensity of the large wavelength band (i.e. centered at  $\sim 3400\text{ cm}^{-1}$ ) and exhibits the highest drug loading efficiency. The experimental curve (solid bold gray line) is decomposed in gaussian peaks (dotted lines) that combined form the fitted curve (dashed line).

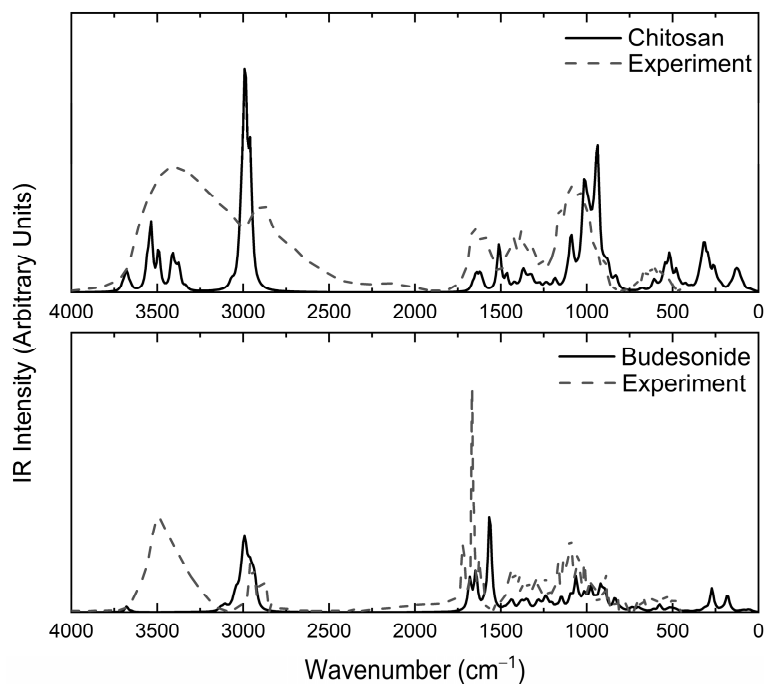

**Figure S2.** Experimental (FT-IR) and computed infrared spectra of (top) Chitosan, and (bottom) Budesonide. The experimental curves are shown with dashed lines and the theoretical curve with solid lines, computed at the B97-D3(BJ)/def2-TZVP/PCM level of theory.
